# Supplementary material for: Cohort profile: the Health of Philippine Emigrants Study (HoPES) to examine the health impacts of international migration from the Philippines to the USA
Source: PubMed Central journal article supplement — BMJ Open. 2019 Nov 14;9(11):e032966. doi: 10.1136/bmjopen-2019-032966 (PMC6886980; doi:10.1136/bmjopen-2019-032966), 2019-11-14
Supplement: bmjopen-2019-032966.draft_revisions.pdf [file bmjopen-2019-032966.draft_revisions.pdf]

# BMJ Open

BMJ Open is committed to open peer review. As part of this commitment we make the peer review history of every article we publish publicly available.

When an article is published we post the peer reviewers' comments and the authors' responses online. We also post the versions of the paper that were used during peer review. These are the versions that the peer review comments apply to.

The versions of the paper that follow are the versions that were submitted during the peer review process. They are not the versions of record or the final published versions. They should not be cited or distributed as the published version of this manuscript.

BMJ Open is an open access journal and the full, final, typeset and author-corrected version of record of the manuscript is available on our site with no access controls, subscription charges or pay-per-view fees (<http://bmjopen.bmj.com>).

If you have any questions on BMJ Open's open peer review process please email [info.bmjopen@bmj.com](mailto:info.bmjopen@bmj.com)

# BMJ Open

## Cohort Profile: The Health of Philippine Emigrants Study (HoPES) to examine the health impacts of international migration from the Philippines to the United States

|                               |                                                                                                                                                                                                                                                                                                                                                                                                                                                                                                                                                                                                                                                                                                                                                                                   |
|-------------------------------|-----------------------------------------------------------------------------------------------------------------------------------------------------------------------------------------------------------------------------------------------------------------------------------------------------------------------------------------------------------------------------------------------------------------------------------------------------------------------------------------------------------------------------------------------------------------------------------------------------------------------------------------------------------------------------------------------------------------------------------------------------------------------------------|
| Journal:                      | <i>BMJ Open</i>                                                                                                                                                                                                                                                                                                                                                                                                                                                                                                                                                                                                                                                                                                                                                                   |
| Manuscript ID                 | bmjopen-2019-032966                                                                                                                                                                                                                                                                                                                                                                                                                                                                                                                                                                                                                                                                                                                                                               |
| Article Type:                 | Cohort profile                                                                                                                                                                                                                                                                                                                                                                                                                                                                                                                                                                                                                                                                                                                                                                    |
| Date Submitted by the Author: | 16-Jul-2019                                                                                                                                                                                                                                                                                                                                                                                                                                                                                                                                                                                                                                                                                                                                                                       |
| Complete List of Authors:     | de Castro, A.; University of Washington, School of Nursing<br>Hing, Anna; University of California Los Angeles, Fielding School of Public Health<br>Lee, Nanette; University of San Carlos, Office of Population Studies Foundation, Inc.<br>Kabamalan, Maria; University of the Philippines Diliman, College of Social Sciences and Philosophy<br>Llave, Karen; University of California Los Angeles, Fielding School of Public Health<br>Crespi, Catherine M. ; University of California Los Angeles, Fielding School of Public Health<br>Wang, May; University of California Los Angeles, Fielding School of Public Health<br>Gee, Gilbert; University of California Los Angeles Jonathan and Karin Fielding School of Public Health, Department of Community Health Sciences. |
| Keywords:                     | PUBLIC HEALTH, Longitudinal, Migration, Obesity, EPIDEMIOLOGY                                                                                                                                                                                                                                                                                                                                                                                                                                                                                                                                                                                                                                                                                                                     |
|                               |                                                                                                                                                                                                                                                                                                                                                                                                                                                                                                                                                                                                                                                                                                                                                                                   |

SCHOLARONE™  
Manuscripts

1  
2  
3 **Cohort Profile: The Health of Philippine Emigrants Study (HoPES) to examine the health**  
4 **impacts of international migration from the Philippines to the United States**  
5  
6

7 \*A.B. de Castro, PhD, MSN/MPH, RN, FAAN, Department of Child, Family, and Population  
8 Health Nursing, School of Nursing, University of Washington, Box 357260, Seattle, WA 98195,  
9 USA, (206) 543-6819, butchdec@uw.edu  
10

11 Anna K. Hing, MPH, Department of Community Health Sciences, Fielding School of Public  
12 Health, University of California, Los Angeles, Los Angeles, CA, USA  
13

14 Nanette R. Lee, PhD, USC-Office of Population Studies Foundation, Inc. and Department of  
15 Anthropology, Sociology and History, University of San Carlos, Talamban, Cebu City,  
16 Philippines  
17

18 Maria Midea M. Kabamalan, PhD, Population Institute, College of Social Sciences and  
19 Philosophy, University of the Philippines, Diliman, Quezon City, Philippines  
20

21 Karen Llave, MPH, Department of Community Health Sciences, Fielding School of Public  
22 Health, University of California, Los Angeles, Los Angeles, CA, USA  
23

24 Catherine M. Crespi, PhD, Department of Biostatistics, Fielding School of Public Health,  
25 University of California, Los Angeles, Los Angeles, CA, USA  
26

27 May C. Wang, DrPH, Department of Community Health Sciences, Fielding School of Public  
28 Health, University of California, Los Angeles, Los Angeles, CA, USA  
29

30 Gilbert C. Gee, PhD, Department of Community Health Sciences, Fielding School of Public  
31 Health, University of California, Los Angeles, Los Angeles, CA, USA  
32

33 \*Corresponding author  
34  
35

36  
37  
38 Keywords: Public health, epidemiology, longitudinal, migration, obesity  
39

40 Word count: 2814 (excluding title page, abstract, references, and tables)  
41  
42  
43  
44  
45  
46  
47  
48  
49  
50  
51  
52  
53  
54  
55  
56  
57  
58  
59  
60

## ABSTRACT

**Purpose:** The Health of Philippine Emigrants Study (HoPES) longitudinally investigates over three years whether migrating from the Philippines to the United States (U.S.) results in increased risk for obesity relative to non-migrants in the Philippines. The study is designed to test the healthy immigrant hypothesis by collecting health measures from migrants starting from a pre-migration baseline and enrolling a non-migrant cohort matched on age, gender, and education for comparison.

**Participants:** A migrant cohort (n=832) was recruited from clients of the Commission on Filipinos Overseas prior to exiting the Philippines. A non-migrant cohort (n=805) was recruited from among community households in municipalities throughout the cities of Manila and Cebu. By intention, these two cohorts are comparable demographically, including urban/rural status of residency in the Philippines at baseline.

**Findings to date:** At baseline, migrants report significantly better self-rated health and less depression, and have significantly lower body mass index and waist-to-hip ratio. Migrants had a lower mean level of c-reactive protein, however higher mean level of Apolipoprotein B.

**Future plans:** Data collection is scheduled to be completed in December 2020, time that the final data collection wave (36 months after baseline) will conclude for the non-migrant cohort. Both migrant and non-migrant cohorts will be maintained so long as research funding allows and emerges for new proposed study questions. Findings can inform the need and design of health-related/relevant interventions, whether clinical, behavioral, educational, policy, that are implemented at the individual or population level.

## STRENGTHS AND LIMITATIONS

- Migrant cohort enrolled starting from pre-migration baseline data collection in country of origin and followed prospectively post-migration in destination country.
- A matched cohort of matched non-migrants in the country of origin is enrolled providing opportunities for comparative data analyses.

- 1  
2  
3 • Data collected involved both subjective and objective, biological measures of health status,  
4 including frozen banking of dried blood spots creating future opportunities for laboratory  
5 assays.  
6  
7  
8  
9 • Non-migrant cohort is not representative of the general population, however the study  
10 objective is for them to be demographically similar to the migrant cohort.  
11  
12  
13  
14 • Possibility of participant attrition, including because of continued migration domestically and  
15 internationally.  
16  
17  
18  
19  
20  
21  
22  
23  
24  
25  
26  
27  
28  
29  
30  
31  
32  
33  
34  
35  
36  
37  
38  
39  
40  
41  
42  
43  
44  
45  
46  
47  
48  
49  
50  
51  
52  
53  
54  
55  
56  
57  
58  
59  
60
- Data collected involved both subjective and objective, biological measures of health status, including frozen banking of dried blood spots creating future opportunities for laboratory assays.
  - Non-migrant cohort is not representative of the general population, however the study objective is for them to be demographically similar to the migrant cohort.
  - Possibility of participant attrition, including because of continued migration domestically and internationally.

## INTRODUCTION

The prevailing view of the immigrant health literature asserts that immigrants arrive in the destination country with better health status relative to their same race/ethnicity counterparts born in that country. However, this health advantage has been observed to decline over time with duration in the new country. Research has documented this phenomenon across a variety of physical and mental health outcomes, as well as population groups [1-6]. In the U.S. context, immigrants originating from developing often exhibit the *immigrant health paradox* [7-9], referring to the contradiction that immigrants generally have better health than U.S. born individuals who presumably have access to better healthcare services, reside in better environmental conditions, and have better opportunities for employment and education. As well, the phrase *healthy immigrant hypothesis* has been coined to suggest that immigrants generally have better health as a function of higher social class (e.g., having education, employability, and fiscal resources) compared to others in their country of origin, which positions them with the prospect and opportunity to emigrate. While a body of research has informed these perspectives, the preponderance of studies have not been designed to thoroughly investigate them. More specifically, conventional understanding of immigrant health has been premised on cross-sectional studies utilizing self-report survey data collected after arrival in the U.S. and without a comparison group in the country of origin. The Health of Philippine Emigrants Study (HoPES) was created to address these major limitations in the field of immigrant health by collecting both survey and objective health measures starting from a pre-migration baseline and enrolling a non-migrant cohort matched on age, gender, and education.

Filipinos have a long history of migration to the U.S., dating back to the late 1500's and continuing over subsequent centuries, with migration at various times tied to labor, political, and military service reasons. In 2016, there were 4.1 million Filipinos in the U.S., approximately half of whom were immigrants [10]. As such, Filipino immigrants are a significant population group within which to explore the health effects of migration. A well-documented health issue among

1  
2  
3 Filipinos in the U.S., as well as in the Philippines, is obesity and concomitant chronic health  
4 conditions such as hypertension, diabetes, and cardiovascular disease [11-16]. HoPES  
5 principally examines changes in dietary patterns and body weight in the context of migration. A  
6  
7 popular hypothesis is that immigrants become acculturated to U.S. lifestyles and behaviors,  
8  
9 including eating larger food portion sizes, consuming more convenient processed, unhealthy  
10  
11 fast foods, and being more sedentary [17-21]. Immigrants are also exposed to stressors  
12  
13 associated with living in a new country (e.g., struggling with employment and having low  
14  
15 income, discrimination, and separation from family and friends in the country of origin) which  
16  
17 may prompt feelings of stress and lead to unhealthy dietary practices [22-24]. However,  
18  
19 whether risk of unhealthy eating and weight gain can be attributed solely to the immigrant  
20  
21 experience has not been conceptualized through the lens of globalization. Indeed, rates of  
22  
23 obesity have been rising worldwide, including the Philippines. [25-27]. Accordingly, the  
24  
25 overarching empirical question, which HoPES seeks to answer, is whether migrating to the U.S.  
26  
27 results in increased risk for obesity (losing the healthy immigrant advantage) or if this risk would  
28  
29 have been the same had an immigrant remained in the Philippines.  
30  
31  
32  
33

### 34 **COHORT DESCRIPTION**

35  
36  
37 The HoPES study includes a migrant cohort and a non-migrant cohort. The migrant  
38  
39 cohort consists of emigrants with legal permission to exit the Philippines for permanent  
40  
41 residency in the U.S. Migrant cohort participants were enrolled starting at a pre-migration  
42  
43 baseline before departing the Philippines and are followed prospectively after arriving in the  
44  
45 U.S. up to three years. These migrant participants were recruited onsite at either the Manila or  
46  
47 Cebu office of the Commission on Filipinos Overseas (CFO), the national Philippine government  
48  
49 agency that oversees legal migration and where legal emigrants must register and process their  
50  
51 exit from the Philippines. HoPES research staff approached and screened individuals at the  
52  
53 CFO locations for study eligibility: aged 20-59 years, departing the Philippines for the U.S. within  
54  
55 three months, ability to speak English, Tagalog, or Cebuano, and not known to be pregnant (as  
56  
57  
58  
59  
60

1  
2  
3 this study prospectively assesses weight gain). From a total of 3,412 individuals approached,  
4  
5 2,279 met eligibility criteria, and 832 (36.5% of those eligible) consented and enrolled in the  
6  
7 study. While there were no target numbers for the migrant cohort by gender, age, and  
8  
9 education; distributions along these categories ended up reflecting similar demographic profiles  
10  
11 of the recent immigrant Filipino population in the U.S. For example, according to the 2011-2013  
12  
13 American Community Survey (<https://www.census.gov/programs-surveys/acs>), among  
14  
15 immigrant Filipinos who have been in the U.S. for less than two years, 11% are males aged 20-  
16  
17 34 with a college education, which is the same percentage of this same group in the HoPES  
18  
19 migrant cohort. Additional details are reported elsewhere [28].  
20  
21

22 The second cohort consists of non-migrants who remain in the Philippines. Recruitment  
23  
24 of this non-migrant cohort was based on stratified random sampling of households using three  
25  
26 strata: Metro Manila (urban), Cebu (urban), and Cebu (rural). For each of these stratum,  
27  
28 *barangay* (smallest administrative government division, somewhat like a census tract) were  
29  
30 sampled with probability proportional to population size. Within each selected *barangay*, cluster  
31  
32 sampling of households was conducted, then individuals were sampled within each household.  
33  
34 Non-migrants were screened with the same age, language, and pregnancy inclusion criteria as  
35  
36 migrants, with additional criteria of having resided in the *barangay* for the past two years and  
37  
38 having no plans to move out of the *barangay* over the next three years. As non-migrants were  
39  
40 sampled, numbers were tracked to achieve comparability to the gender, age, education, and  
41  
42 urbanicity frequencies of the migrant cohort. Of the 2,215 non-migrant individuals approached,  
43  
44 1,173 met eligibility criteria, and 805 (68.6% of those eligible) consented and enrolled in the  
45  
46 study.  
47  
48

49 Table 1 provides demographic characteristics at time of recruitment and enrollment of  
50  
51 the migrant and non-migrant participants, as well as those who were eligible but did not  
52  
53 participate. Attrition rate for each of the cohorts has not yet been determined because collection  
54  
55 of follow-up data is still ongoing; thus we report only on the baseline stage of the study.  
56  
57



**Table 1. Demographic characteristics of HoPES participants and non-participants at time of recruitment and enrollment.**

|                                              | Migrants                |                                              |                 | Non-migrants            |                                             |                 |
|----------------------------------------------|-------------------------|----------------------------------------------|-----------------|-------------------------|---------------------------------------------|-----------------|
|                                              | Participants<br>(n=832) | Eligible<br>non-<br>participants<br>(n=1447) | <i>p</i> -value | Participants<br>(n=805) | Eligible<br>non-<br>participants<br>(n=355) | <i>p</i> -value |
| Age in years<br>(mean; SD)                   | 35.46<br>(11.57)        | 38.53<br>(11.64)                             | .000            | 36.53<br>(11.47)        | 35.77<br>(10.81)                            | .304            |
| Female<br>(number; %)                        | 553<br>(66.47%)         | 865<br>(60.15%)                              | .003            | 548<br>(68.07%)         | 185<br>(50.41%)                             | .000            |
| Education<br>(number; %)                     |                         |                                              | .049            |                         |                                             | .000            |
| Some high<br>school or<br>less               | 50<br>(6.08%)           | 63<br>(4.41%)                                |                 | 101<br>(12.85%)         | 15<br>(4.18%)                               |                 |
| High<br>school<br>degree                     | 170<br>(20.68%)         | 247<br>(17.30%)                              |                 | 143<br>(18.19%)         | 59<br>(16.43%)                              |                 |
| Some<br>college or<br>vocational<br>training | 190<br>(23.11%)         | 354<br>(24.79%)                              |                 | 320<br>(40.71%)         | 127<br>(35.38%)                             |                 |
| College<br>degree or<br>higher               | 412<br>(50.12%)         | 764<br>(53.50%)                              |                 | 222<br>(28.24%)         | 158<br>(44.01%)                             |                 |

NOTE: Pearson's chi-squared tests were conducted to calculate *p*-values indicating if participant and non-participant groups were statistically different from each another.

For the migrant cohort, pre-migration baseline data (both survey-based and objective, biological measures; see below) was collected between February to September 2017. Subsequent collection of survey data is scheduled after arrival in the U.S. at 3, 12, and 24 months after baseline and will be conducted by telephone (because of logistical and budget

1  
2  
3 constraints, since migrants can be located all across the U.S.). At 36 months after baseline, an  
4 in-person home visit will be made to collect both survey data and objective, biological measures.  
5 For the non-migrant cohort in the Philippines, baseline data (both survey-based and objective,  
6 biological measures) was collected between May to September 2017. Follow-up data collection  
7 for non-migrants will follow the same pattern as for migrants, except without the 3-month follow-  
8 up, and will be done via in-person home visits unless participant residence at the 12- and 24-  
9 month mark necessitates conducting by phone.  
10  
11  
12  
13  
14  
15  
16  
17

18 Baseline data collection for both the migrant and non-migrant cohorts was conducted in  
19 the Philippines. For migrants, this was done in private office spaces in the CFO buildings in  
20 Manila and Cebu. For non-migrants, this was done with in-home visits in community settings.  
21 Table 2 lists the types and topics of data collected at baseline. Self-report measures were  
22 collected via interviewer-administered survey. Migrants and non-migrants were asked the same  
23 survey questions, with migrants being asked an additional set of questions related to migration.  
24 Objective measures (e.g., height, weight, hip and waist circumferences, blood pressure) were  
25 obtained by trained nurses. A point-of-care device was used to measure a non-fasting lipid  
26 panel. Dried blood spots (DBS) were collected for laboratory analysis of c-reactive protein  
27 (CRP) and Apolipoprotein B (ApoB) levels. DBS specimens are being kept in frozen storage (-  
28 80° Celsius) and are available for other additional laboratory assay analyses in the future. The  
29 survey questions will be repeated for each follow-up data collection wave (as above); with  
30 phrasing modifications made to fit the post-migration context for the migrant cohort. As  
31 mentioned, objective, biological measures are only collected at baseline and 36 months later.  
32  
33  
34  
35  
36  
37  
38  
39  
40  
41  
42  
43  
44  
45  
46  
47  
48  
49  
50  
51  
52  
53  
54  
55  
56  
57  
58  
59  
60

**Table 2. HoPES measures obtained at baseline for migrant and non-migrant cohorts.**

| <b>Self-report measures:</b>    |                                                                                                                                                                                                    |
|---------------------------------|----------------------------------------------------------------------------------------------------------------------------------------------------------------------------------------------------|
| Health status                   | Self-rated health, chronic health conditions (MOS), medication use, depressive symptoms (Patient-Reported Outcomes Measurement Information System); cognitive impairment; homesickness             |
| Health behaviors                | Physical activity (International Physical Activity Questionnaire), smoking (CDC Behavioral Risk Factor Surveillance System), alcohol consumption (BRFSS), sleep quality and duration; help seeking |
| Diet                            | Food frequency questionnaire; food procurement and insecurity, dietary acculturation                                                                                                               |
| Stress                          | Perceived stress, acculturative stress, unfair treatment                                                                                                                                           |
| Culture                         | Filipino attitudes and beliefs, social identity, language use and proficiency (including English)                                                                                                  |
| Socioeconomic position          | Currently employed, current occupation and job duties, personal income, financial strain, remittances                                                                                              |
| Social networks                 | Family and friends in the U.S. and Philippines, social isolation, social capital                                                                                                                   |
| Geography                       | Barangay and province for migrants; postal address for non-migrants; postal address in U.S. for migrants                                                                                           |
| Migration (migrant cohort only) | Visa type, family accompaniment, preparation, reasons for migrating, views about U.S., job waiting in U.S.                                                                                         |
| <b>Objective measures:</b>      |                                                                                                                                                                                                    |
| Anthropometrics                 | Height, weight, waist circumference, hip circumference                                                                                                                                             |
| Biological measurements         | Blood pressure, lipids (non-fasting total cholesterol, high-density lipoproteins, low-density lipoproteins, triglycerides), C-reactive protein, and Apolipoprotein B                               |

## **PATIENT AND PUBLIC INVOLVEMENT**

Study participants for this project were not from a clinical patient population, but rather recruited and enrolled from among the general population, and were not involved in the recruitment to and conduct of the study. The study purpose, aims, and design were principally

1  
2  
3 conceived of and developed by the principal investigators and collaborators. However, prior to  
4 execution of the project, input and consultation on these aspects were sought and received from  
5 officials at the CFO, the primary government agency responsible for promoting and upholding  
6 the interests, rights and welfare of migrant Filipinos. As they are available, data analysis and  
7 results are presented to CFO officials, and, captured in lay audience fact sheets made available  
8 to study participants as well as to community and local government stakeholders.  
9  
10  
11  
12  
13  
14

## 15 **FINDINGS TO DATE**

16  
17  
18 Table 3 displays initial univariate estimates (unweighted and weighted) across a variety  
19 of self-report and objective measures indicative of baseline health status for both the migrant  
20 and non-migrant cohorts. At baseline, migrants report significantly better self-rated health and  
21 less depressive symptoms, and have significantly lower body mass index and waist-to-hip ratio.  
22 Migrants also had lower mean level of CRP, however higher mean level of ApoB. Collectively,  
23 these results suggest that migrants have less morbidity than non-migrants, which aligns with the  
24 *healthy immigrant effect* perspective.  
25  
26  
27  
28  
29  
30  
31

## 32 **STRENGTHS AND LIMITATIONS**

33  
34  
35 HoPES is one of the very few longitudinal studies of migration and health that has  
36 enrolled participants starting from a pre-migration baseline phase in one country (Philippines)  
37 and followed them into a post-migration period in another (U.S.). Other known studies have  
38 followed migrants from Mexico to the U.S. and migrants from Russia and Ukraine to Israel [29-  
39 32]. Our study has the added feature of following a migrant cohort across continents from Asia  
40 to North America. As mentioned above, the demographic profile of our migrant cohort is very  
41 similar to that of the recent immigrant Filipino population in the U.S., per the 2011-2013  
42 American Community Survey. A group of non-migrants (similar in age, gender, and education)  
43 in the country of origin is enrolled, which other studies of migration and health have not  
44  
45  
46  
47  
48  
49  
50  
51  
52  
53  
54  
55  
56  
57  
58  
59  
60

**Table 3. Mean or proportion (and standard error) for health status measures comparing migrants and non-migrants (weighted vs. unweighted; both adjusted for age and sex).**

|                                                          | Migrants (n=832) |              | Non-migrants (n=805) |              | <i>p</i> -value             |                           |
|----------------------------------------------------------|------------------|--------------|----------------------|--------------|-----------------------------|---------------------------|
|                                                          | Unweighted       | Weighted     | Unweighted           | Weighted     | Comparing unweighted values | Comparing weighted values |
| Self-rated health (Excellent/Very good/Good; proportion) | .74 (.02)        | .73 (.02)    | .34 (.02)            | .35 (.02)    | .000                        | .000                      |
| Depressive symptoms; range: 5 (low) to 25 (high)         | 6.55 (.09)       | 6.52 (.09)   | 8.53 (.13)           | 8.51 (.14)   | .000                        | .000                      |
| Height (cm); mean                                        | 158.09 (.20)     | 158.00 (.20) | 155.88 (.20)         | 156.20 (.21) | .000                        | .000                      |
| Weight (kg)                                              | 60.93 (.38)      | 61.14 (.39)  | 60.33 (.44)          | 60.50 (.46)  | .338                        | .275                      |
| Body mass index (kg/m <sup>2</sup> )                     | 24.27 (.14)      | 24.38 (.14)  | 24.77 (.16)          | 24.72 (.17)  | .057                        | .132                      |
| Waist circumference (cm)                                 | 86.00 (.34)      | 86.32 (.34)  | 86.41 (.39)          | 86.37 (.40)  | .806                        | .969                      |
| Hip circumference (cm)                                   | 95.94 (.26)      | 96.10 (.26)  | 94.47 (.30)          | 94.50 (.31)  | .000                        | .000                      |
| Waist-to-hip ratio                                       | .89 (.00)        | .89 (.00)    | .91 (.00)            | .91 (.00)    | .000                        | .000                      |
| Systolic blood pressure (mmHg)                           | 120.52 (.53)     | 121.18 (.55) | 119.10 (.61)         | 119.02 (.63) | .007                        | .007                      |
| Diastolic blood pressure (mmHg)                          | 80.40 (.35)      | 80.67 (.36)  | 79.96 (.41)          | 80.09 (.43)  | .144                        | .274                      |
| C-reactive protein (mg/L)                                | 1.68 (.10)       | 1.69 (.10)   | 1.90 (.12)           | 1.91 (.12)   | .19                         | .06                       |
| Apolipoprotein B (mg/dL)                                 | 33.24 (.53)      | 33.34 (.53)  | 24.40 (.46)          | 23.94 (.46)  | .000                        | .000                      |

NOTE: T-tests for continuous variables and z-tests for categorical variables were conducted using multilinear regression models to calculate *p*-values indicating if migrant and non-migrant groups were statistically different from each another for each predictor and for both weighted and unweighted analyses, controlling for age and sex.

1  
2  
3 included, providing opportunities for comparative data analyses. For migrants, having started  
4 from a pre-migration baseline, data represent health status and life experiences prior to  
5 migration. Data, for both migrants and non-migrants, include objective, biological measures of  
6 health status, in addition to self-report responses that, to our knowledge, has not been collected  
7 in other longitudinal studies of migration. The collection and frozen banking of DBS creates  
8 future opportunities for laboratory analyses of emerging and yet to be developed assays. Also,  
9 meticulous efforts were undertaken to assure linguistic and cultural appropriateness of survey  
10 instruments, including data obtained through a food frequency questionnaire tailored to Filipino  
11 foods and diet. Additionally, for each participant, residential address is collected at each follow-  
12 up wave, allowing for geocoding and analyses integrating geographical information system data.

13  
14  
15  
16  
17  
18  
19  
20  
21  
22  
23  
24 Due to the nature of the study, the non-migrants are purposefully not representative of  
25 the general population of the Philippines. This was due to our aim to evaluate the effect of  
26 migration as a “treatment.” Similar to a randomized clinical trial, it is desirable to have the two  
27 cohorts similar on key characteristics at baseline. Thus, our objective for the non-migrant cohort  
28 was to enroll a group similar in characteristics (age, gender, education) to the migrant cohort,  
29 which would then render the non-migrant sample not representative of the general population.  
30 While the overall sample sizes for each cohort are sufficiently large for our study purposes, it  
31 may be limiting for analyses focused on specific sub-groups (e.g., only women with less than a  
32 high school education). Another potential weakness relates to participation rates and potential  
33 for sampling bias. Comparing participants to eligible non-participants, per Table 1, a few  
34 demographic differences were statistically significant. For example, migrant participants were  
35 older than migrants who were eligible but did not participate; non-migrant participants tended to  
36 be more educated than non-migrants who were eligible but did not participate; and for both  
37 migrant and non-migrant cohorts, there were more females among participants than among  
38 eligible non-participants. With any cohort study, attrition is a concern, particularly when  
39 participants are in a state of geographic movement across countries (migrants) and, likely,  
40  
41  
42  
43  
44  
45  
46  
47  
48  
49  
50  
51  
52  
53  
54  
55  
56  
57

1  
2  
3 within country (migrants after arriving in the U.S. and non-migrants in the Philippines). It is  
4 possible, over the course of the study, that migrant participants may return back to the  
5 Philippines or re-locate to other countries for periods of time and that non-migrant participants  
6 may become migrants themselves (whether to the U.S. or elsewhere). While this poses  
7 additional challenges, if such cases emerge and are retained, their data can yield potentially  
8 interesting, unanticipated findings about continued migration transitions. Because we currently  
9 report only on the baseline stage of this study, retention rates and mobility patterns over the  
10 course of the study have yet to unfold. Strategies to promote retention have been implemented,  
11 such as phone calls, a newsletter, social media, and birthday greetings. Also, we intentionally  
12 over sampled to account for attrition. Lastly, our study does not include a third cohort group of  
13 U.S. born Filipinos, which would have provided another comparison group to more fully examine  
14 the immigrant health paradox.

## 28 **COLLABORATION**

29  
30 Researchers wishing to work with HoPES data can contact the principal investigators  
31 (GGGGG@XXXX.UUU and DDDDD@XX.UUU) to discuss analysis ideas (from cross-sectional  
32 to longitudinal) and possible collaborative efforts. Requests are invited for studies that  
33 investigate the variety of cross-sectional and longitudinal associations between  
34 sociodemographic characteristics, geographical locations (e.g. migration patterns,  
35 neighborhood/community factors), stressors, cultural shifts and both subjective and objective  
36 measures of health and health behaviors (including and beyond obesity risk related outcomes)  
37 that characterize how differential burdens of illness/disease play out in the context of migration  
38 and globalization. Also, because DBS are frozen and stored, collaborations involving studies  
39 with laboratory analysis of analytes other than CRP and Apolipoprotein B are of interest.

40  
41 A data user agreement is available for interested researchers to specify a working title of  
42 their proposed project; a 1-2 paragraph abstract that articulates a research question,  
43 hypotheses, and supporting rationale; a description of the analysis plan, including the specific

1  
2  
3 statistical techniques to be used; the list the specific variables needed for the analysis, including  
4 identifying dependent vs. independent variables, and control variables; and a statement of  
5 dissemination plans, including prospective journals and conference meetings where the analysis  
6 will be reported. The principal investigators will consider the request and determine its  
7 approval. The data user agreement also delineates a list of conditions that users must agree to;  
8 such as not sharing or distributing the data without prior authorization from the principal  
9 investigators, using the requested data only according to the proposed use, sharing with the  
10 principal investigators documentation of new variables of major study constructs, and prompt  
11 notification of submissions and acceptances for presentations and publications.  
12  
13  
14  
15  
16  
17  
18  
19  
20  
21

## 22 **FURTHER DETAILS**

23  
24 Drs. DDDDD and GGGGG serve as the co-principal investigators for HoPES and led the  
25 overall conceptualization of the research design, directed the analysis, and oversaw logistics to  
26 carry out project activities. Dr. DDDDD led the writing of this paper, with the assistance of Dr.  
27 GGGGG and Ms. HHHHH who also conducted the statistical analysis. Drs. LLLLLL, MMMMM,  
28 WWWWW, and CCCCC were primary collaborators for all project activities including study  
29 participant recruitment, data collection and analysis, and assisted with paper writing and review.  
30 Ms. LLLLLL served as the HoPES project manager and assisted with reviewing this paper. None  
31 of the authors have any competing interests with respect to the HoPES research project or the  
32 publication of this paper. Primary funding for HoPES was provided by the XXXXX (grant  
33 #XXXXX), and, prior pilot funding was provided by the XXXXX (grant #XXXXX) and the XXXXX  
34 (grant #XXXXX). Data can be shared upon request and approval as described above.  
35  
36  
37  
38  
39  
40  
41  
42  
43  
44  
45  
46

## 47 **ACKNOWLEDGMENTS**

48  
49 HoPES would not have been possible without the imaginative ingenuity, collaborative  
50 spirit, and tireless efforts from multiple sources. The interdisciplinary team consists of  
51 researchers and staff from the U.S. and the Philippines with a shared interest and vision to  
52 advance the health of immigrant populations. Others making important contributions through  
53  
54  
55  
56  
57



1  
2  
3 their knowledge, skills, and time were (INDIVIDUALS #1-8), and all members of the data  
4 collection staff. The cooperation, approval, support, and assistance from staff of the  
5 Commission on Filipinos Overseas, namely (INDIVIDUALS #9-13), who made it possible to  
6 recruit and enroll migrant participants. We also greatly appreciate permissions granted and  
7 facilitated by government officials in local municipal jurisdictions to enter communities to recruit  
8 and enroll non-migrant participants from community households. And, we express our deep  
9 appreciation to all of the HoPES participants who generously provided their time and willingness  
10 for us to collect data measures. Lastly, we dedicate this paper to (INDIVIDUAL #14) in memory  
11 of his truly incomparable friendship and many selfless acts to help make this research project a  
12 reality.  
13  
14  
15  
16  
17  
18  
19  
20  
21  
22  
23  
24  
25  
26  
27  
28  
29  
30  
31  
32  
33  
34  
35  
36  
37  
38  
39  
40  
41  
42  
43  
44  
45  
46  
47  
48  
49  
50  
51  
52  
53  
54  
55  
56  
57  
58  
59  
60

## REFERENCES

1. Antecol H, Bedard K. Unhealthy assimilation: Why do immigrants converge to American health status levels? *Demography* 2006;43(2):337-60.
2. Argeseanu Cunningham S, Ruben JD, Narayan KM. Health of foreign-born people in the United States: A review. *Health Place* 2008;14(4):623-35.
3. Frisbie WP, Cho Y, Hummer RA. Immigration and the health of Asian and Pacific Islander adults in the United States. *Am J Epidemiol* 2001;153(4):372-80.
4. Goldman N, Pebley AR, Creighton MJ, et al. The consequences of migration to the United States for short-term changes in the health of Mexican immigrants. *Demography* 2014;51(4):1159-73.
5. Ro A. The longer you stay, the worse your health? A critical review of the negative acculturation theory among Asian immigrants. *Int J of Environ Res and Public Health* 2014;11(8):8038-57.
6. Fuller-Thomson E, Noack AM, George U. Health decline among recent immigrants to Canada: findings from a nationally-representative longitudinal survey. *Can J Public Health* 2011;102(4):273-80.
7. Alarcón RD, Parekh A, Wainberg ML, et al. Hispanic immigrants in the USA: Social and mental health perspectives. *Lancet Psychiatry* 2016;3(9):860-70.
8. Franzini L, Ribble JC, Keddie AM. Understanding the Hispanic paradox. *Ethn Dis* 2001;11(3):496-518.
9. Markides K, Coreil J. The health of Hispanics in the south-western United States: An epidemiological paradox. *Public Health Rep* 1986;10:253-65.
10. Zong J, Batalova J. Filipino immigrants in the United States. Migration Information Source; March 14, 2018. Available from: <https://www.migrationpolicy.org/article/filipino-immigrants-united-states>. Accessed July 14, 2019.

- 1  
2  
3 11. Abesamis CJ, Fruh S, Hall H, et al. Cardiovascular health of Filipinos in the United States: A  
4  
5 review of the literature. *J Transcult Nurs* 2016;27(5):518–28.  
6
- 7 12. Du Y, Shih M, Lightstone AS, et al. Hypertension among Asians in Los Angeles County:  
8  
9 Findings from a multiyear survey. *Prev Med Rep* 2017;6:302-6.  
10
- 11 13. Lee JW, Brancati FL, Yeh HC. Trends in the prevalence of type 2 diabetes in Asians versus  
12  
13 whites: results from the United States National Health Interview Survey, 1997-2008.  
14  
15 *Diabetes Care* 2011;34(2):353-7.  
16
- 17 14. Singh GK, Lin SC. Dramatic increases in obesity and overweight prevalence among Asian  
18  
19 subgroups in the United States, 1992-2011. *ISRN Prev Med* 2013;898691.  
20
- 21 15. Staimez LR, Weber MB, Narayan KM, et al. A systematic review of overweight, obesity, and  
22  
23 type 2 diabetes among Asian American subgroups. *Curr Diabetes Rev* 2013;9(4):312-31.  
24  
25
- 26 16. Ye J, Rust G, Baltrus P, et al. Cardiovascular risk factors among Asian Americans: Results  
27  
28 from a national health survey. *Ann Epidemiol* 2009;19(10):718-23.  
29
- 30 17. Ayala GX, Baquero B, Klinger S. A systematic review of the relationship between  
31  
32 acculturation and diet among Latinos in the United States: implications for future research. *J*  
33  
34 *Am Diet Assoc* 2008;108(8):1330-44.  
35  
36
- 37 18. Kandula NR, Lauderdale DS. Leisure time, non-leisure time, and occupational physical  
38  
39 activity in Asian Americans. *Ann Epidemiol* 2005;15(4):257-65.  
40
- 41 19. Serafica RC. Dietary acculturation in Asian Americans. *J Cult Divers* 2014;21(4):145-51.  
42
- 43 20. Tovar A, Boulos R, Sliwa S, et al. Baseline socio-demographic characteristics and self-  
44  
45 reported diet and physical activity shifts among recent immigrants participating in the  
46  
47 randomized controlled lifestyle intervention: "Live Well." *J Immigr Minor Health*  
48  
49 2014;16(3):457-65.  
50
- 51 21. Zan H, Fan JX. Reporting more but moving less? The complex relationship between  
52  
53 acculturation and physical activity among US adults. *Am J Health Promot* 2018;32(2):446-  
54  
55 52.  
56  
57

- 1  
2  
3 22. Finch BK, Catalano RC, Novaco RW, et al. Employment frustration and alcohol  
4  
5 abuse/dependence among labor migrants in California. *J Immigr Health* 2003;5(4):181-6.  
6
- 7 23. Gee GC, Ro A, Gavin A, et al. Disentangling the effects of racial and weight discrimination  
8  
9 on body mass index and obesity among Asian Americans. *Am J Public Health*  
10  
11 2008;98(3):493-500.  
12
- 13 24. Tovar A, Must A, Metayer N, et al. Immigrating to the US: What Brazilian, Latin American  
14  
15 and Haitian women have to say about changes to their lifestyle that may be associated with  
16  
17 obesity. *J Immigr Minor Health* 2013;15(2):357-64.  
18
- 19 25. NCD Risk Factor Collaboration (NCD-RisC). Worldwide trends in body-mass index,  
20  
21 underweight, overweight, and obesity from 1975 to 2016: A pooled analysis of 2416  
22  
23 population-based measurement studies in 128·9 million children, adolescents, and adults.  
24  
25 *Lancet* 2017;390(10113):2627-42.  
26  
27
- 28 26. Ng M. Global, regional, and national prevalence of overweight and obesity in children and  
29  
30 adults during 1980-2013: A systematic analysis for the Global Burden of Disease Study  
31  
32 2013. *Lancet* 2014;384(9945):766-81.  
33
- 34 27. Obesity Update 2017. The Organisation for Economic Co-operation and Development  
35  
36 (OECD); 2017. Available from: [https://www.oecd.org/els/health-systems/Obesity-Update-](https://www.oecd.org/els/health-systems/Obesity-Update-2017.pdf)  
37  
38 2017.pdf. Accessed July 14, 2019.  
39
- 40 28. Gee GC, de Castro AB, Crespi CM, et al. Health of Philippine Emigrants Study (HoPES):  
41  
42 Study design and rationale. *BMC Public Health* 2018;18:771.  
43  
44
- 45 29. Breslau J, Borges G, Tancredi DJ, et al. Health selection among migrants from Mexico to  
46  
47 the U.S.: Childhood predictors of adult physical and mental health. *Public Health Rep*  
48  
49 2011;126(3):361-70.  
50
- 51 30. Goldman N, Pebley AR, Creighton MJ, et al. The consequences of migration to the United  
52  
53 States for short-term changes in the health of Mexican immigrants. *Demography*  
54  
55 2014;51(4):1159-73.  
56  
57

- 1  
2  
3 31. Tartakovsky E. A longitudinal study of acculturative stress and homesickness: High-school  
4 adolescents immigrating from Russia and Ukraine to Israel without parents. *Soc Psychiatry*  
5  
6 *Psychiatr Epidemiol* 2007;42(6):485-94.  
7  
8  
9 32. Tartakovsky E. Cultural identities of adolescent immigrants: A three-year longitudinal study  
10 including the pre-migration period. *J Youth Adolesc* 2009;38(5):654-71.  
11  
12  
13  
14  
15  
16  
17  
18  
19  
20  
21  
22  
23  
24  
25  
26  
27  
28  
29  
30  
31  
32  
33  
34  
35  
36  
37  
38  
39  
40  
41  
42  
43  
44  
45  
46  
47  
48  
49  
50  
51  
52  
53  
54  
55  
56  
57  
58  
59  
60

For peer review only

# BMJ Open

## Cohort Profile: The Health of Philippine Emigrants Study (HoPES) to examine the health impacts of international migration from the Philippines to the United States

|                                 |                                                                                                                                                                                                                                                                                                                                                                                                                                                                                                                                                                                                                                                                                                                                                                                   |
|---------------------------------|-----------------------------------------------------------------------------------------------------------------------------------------------------------------------------------------------------------------------------------------------------------------------------------------------------------------------------------------------------------------------------------------------------------------------------------------------------------------------------------------------------------------------------------------------------------------------------------------------------------------------------------------------------------------------------------------------------------------------------------------------------------------------------------|
| Journal:                        | <i>BMJ Open</i>                                                                                                                                                                                                                                                                                                                                                                                                                                                                                                                                                                                                                                                                                                                                                                   |
| Manuscript ID                   | bmjopen-2019-032966.R1                                                                                                                                                                                                                                                                                                                                                                                                                                                                                                                                                                                                                                                                                                                                                            |
| Article Type:                   | Cohort profile                                                                                                                                                                                                                                                                                                                                                                                                                                                                                                                                                                                                                                                                                                                                                                    |
| Date Submitted by the Author:   | 20-Sep-2019                                                                                                                                                                                                                                                                                                                                                                                                                                                                                                                                                                                                                                                                                                                                                                       |
| Complete List of Authors:       | de Castro, A.; University of Washington, School of Nursing<br>Hing, Anna; University of California Los Angeles, Fielding School of Public Health<br>Lee, Nanette; University of San Carlos, Office of Population Studies Foundation, Inc.<br>Kabamalan, Maria; University of the Philippines Diliman, College of Social Sciences and Philosophy<br>Llave, Karen; University of California Los Angeles, Fielding School of Public Health<br>Crespi, Catherine M. ; University of California Los Angeles, Fielding School of Public Health<br>Wang, May; University of California Los Angeles, Fielding School of Public Health<br>Gee, Gilbert; University of California Los Angeles Jonathan and Karin Fielding School of Public Health, Department of Community Health Sciences. |
| <b>Primary Subject Heading</b>: | Public health                                                                                                                                                                                                                                                                                                                                                                                                                                                                                                                                                                                                                                                                                                                                                                     |
| Secondary Subject Heading:      | Epidemiology, Global health, Nutrition and metabolism                                                                                                                                                                                                                                                                                                                                                                                                                                                                                                                                                                                                                                                                                                                             |
| Keywords:                       | PUBLIC HEALTH, Longitudinal, Migration, Obesity, EPIDEMIOLOGY                                                                                                                                                                                                                                                                                                                                                                                                                                                                                                                                                                                                                                                                                                                     |
|                                 |                                                                                                                                                                                                                                                                                                                                                                                                                                                                                                                                                                                                                                                                                                                                                                                   |

SCHOLARONE™  
Manuscripts

1  
2  
3 **Cohort Profile: The Health of Philippine Emigrants Study (HoPES) to examine the health**  
4 **impacts of international migration from the Philippines to the United States**  
5  
6  
7

8 \*A.B. de Castro, PhD, MSN/MPH, RN, FAAN, University of Washington School of Nursing, Box  
9 357260, Seattle, WA 98195, e-mail: butchdec@uw.edu  
10

11 Anna K. Hing, MPH, UCLA Fielding School of Public Health. 650 Charles E. Young Drive South,  
12 Los Angeles, CA 90095-1772. E-mail: ahing@ucla.edu  
13

14 Nanette R. Lee, PhD, USC-Office of Population Studies Foundation, Inc. and Department of  
15 Anthropology, Sociology and History, University of San Carlos, Talamban, Cebu City,  
16 Philippines. E-mail: nanette\_lee@yahoo.com  
17

18 Maria Midea M. Kabamalan, PhD, Population Institute, College of Social Sciences and  
19 Philosophy, University of the Philippines, Diliman, Quezon City. E-mail:  
20 mmkabamalan@up.edu.ph  
21

22 Karen Llave, MPH, UCLA Fielding School of Public Health. 650 Charles E. Young Drive South,  
23 Los Angeles, CA 90095-1772. E-mail: kllave@ph.ucla.edu  
24

25 Catherine M. Crespi, PhD, UCLA Fielding School of Public Health. 650 Charles E. Young Drive  
26 South, Los Angeles, CA 90095-1772. E-mail: ccrespi@ucla.edu  
27

28 May C. Wang, DrPH, UCLA Fielding School of Public Health. 650 Charles E. Young Drive  
29 South, Los Angeles, CA 90095-1772. E-mail: maywang@ucla.edu  
30

31 Gilbert C. Gee, PhD, UCLA Fielding School of Public Health. 650 Charles E. Young Drive  
32 South, Los Angeles, CA 90095-1772. E-mail: gilgee@ucla.edu  
33

34 \*Corresponding author  
35

36 Word count (abstract): 278  
37

38 Word count (manuscript): 3242  
39

40 <https://bmjopen.bmj.com/pages/authors/>  
41 <https://mc.manuscriptcentral.com/bmjopen>  
42  
43  
44  
45  
46  
47  
48  
49  
50  
51  
52  
53  
54  
55  
56  
57

## ABSTRACT

**Purpose:** The Health of Philippine Emigrants Study (HoPES) longitudinally investigates over three years whether migrating from the Philippines to the United States (U.S.) results in increased risk for obesity relative to non-migrants in the Philippines. The study is designed to test the healthy immigrant hypothesis by collecting health measures from migrants starting from a pre-migration baseline and enrolling a non-migrant cohort matched on age, gender, and education for comparison.

**Participants:** A migrant cohort (n=832; 36.5% of eligible individuals) was recruited from clients of the Commission on Filipinos Overseas prior to exiting the Philippines. A non-migrant cohort (n=805; 68.6% eligible individuals) was recruited from among community households in municipalities throughout the cities of Manila and Cebu. By intention, these two cohorts are comparable demographically, including urban/rural status of residency in the Philippines at baseline.

**Findings to date:** At baseline, compared to non-migrants, migrants report significantly better self-rated health and less depression, and have significantly larger hip circumference and lower waist-to-hip ratio, as well as significantly higher mean systolic blood pressure and higher mean level of Apolipoprotein B. Baseline results can offer insight into the health status of both migrant and non-migrant populations and may be useful for obesity prevention efforts.

**Future plans:** Longitudinal data collection is scheduled to be completed in December 2020 when the final data collection wave (36 months after baseline) will conclude. Both migrant and non-migrant cohorts will be maintained beyond the current prospective study, so long as research funding allows and emerges for new study questions. Findings from future longitudinal analyses can inform the need and design of health-related/relevant interventions, whether clinical, behavioral, educational, policy, that can be implemented at the individual or population level.



### STRENGTHS AND LIMITATIONS

- A cohort of migrants is enrolled into the study starting with data collection at a pre-migration baseline in the country of origin and will be followed prospectively post-migration into the destination country.
- A cohort of non-migrants matched on gender, age, education, and urbanicity in the country of origin was enrolled providing opportunities for comparative data analyses.
- Data collection involves subjective and objective biological measures of health status, including dried blood spots that are frozen creating future opportunities for laboratory assays.
- The non-migrant cohort is not representative of the general population as the study objective is for them to be demographically similar to the migrant cohort.
- As prospective follow-up continues, there is a possibility for participant attrition, including because of continued migration domestically and internationally among both the migrant and non-migrant cohorts.

## INTRODUCTION

The prevailing view of the immigrant health literature asserts that immigrants arrive in the destination country with better health status relative to their same race/ethnicity counterparts born in that country. However, this health advantage has been observed to decline over time with duration in the new country. Research has documented this phenomenon across a variety of physical and mental health outcomes, as well as population groups.[1-6] In the U.S. context, immigrants originating from developing countries often exhibit the *immigrant health paradox*,[7-9] referring to the contradiction that immigrants generally have better health than U.S. born individuals who presumably have access to better healthcare services, reside in better environmental conditions, and have better opportunities for employment and education. As well, the phrase *healthy immigrant hypothesis* has been coined to suggest that immigrants generally have better health as a function of higher social class (e.g., having education, employability, and fiscal resources) compared to others in their country of origin, which positions them with the prospect and opportunity to emigrate. While a body of research has informed these perspectives, the preponderance of studies have not been designed to thoroughly investigate them. More specifically, conventional understanding of immigrant health has been premised on cross-sectional studies utilizing self-report survey data collected after arrival in the U.S. and without a comparison group in the country of origin. The Health of Philippine Emigrants Study (HoPES) was created to address these major limitations in the field of immigrant health by collecting both survey and objective health measures starting from a pre-migration baseline and enrolling a non-migrant cohort in the country of origin matched on age, gender, and education.

Filipinos have a long history of migration to the U.S., dating back to the late 1500's and continuing over subsequent centuries, with migration at various times tied to labor, political, and military service reasons. In 2016, there were 4.1 million Filipinos in the U.S., approximately half of whom were immigrants.[10] As such, Filipino immigrants are a significant population group

1  
2  
3 within which to explore the health effects of migration. A well-documented health issue among  
4 Filipinos in the U.S., as well as in the Philippines, is obesity and concomitant chronic health  
5 conditions such as hypertension, diabetes, and cardiovascular disease.[11-16] HoPES  
6 principally examines changes in dietary patterns and body weight in the context of migration. A  
7 popular hypothesis is that immigrants become acculturated to U.S. lifestyles and behaviors,  
8 including eating larger food portion sizes, consuming more convenient processed, unhealthy  
9 fast foods, and being more sedentary.[17-21] Immigrants are also exposed to stressors  
10 associated with living in a new country (e.g., struggling with employment and having low income  
11 and socioeconomic status, discrimination, and separation from family and friends in the country  
12 of origin) which may prompt feelings of stress and lead to unhealthy dietary practices as well as  
13 adversely impact metabolism.[22-25] Other factors may also play into weight gain among  
14 immigrants, such as epigenetics (i.e., individuals born in lower-income countries to  
15 undernourished mothers may be metabolically prepared to store calories as fat for food scarce  
16 environments, but then are susceptible to weight gain after arrival in a country environment high  
17 in calories, fat, and sugars) and physical activity (i.e., immigrants may participate in less leisure  
18 physical activity but more work physical activity than those born in the destination country) [25-  
19 26]. However, whether risk of unhealthy eating and weight gain can be attributed solely to the  
20 immigrant experience has not been conceptualized through the lens of globalization. Indeed,  
21 rates of obesity have been rising worldwide, including the Philippines.[27-29] Accordingly, the  
22 overarching empirical question that HoPES seeks to answer is whether migrating to the U.S.  
23 results in increased risk for obesity (losing the healthy immigrant advantage) or if this risk would  
24 have been the same had an immigrant remained in the Philippines.

## 25 **COHORT DESCRIPTION**

26 HoPES includes a migrant cohort and a non-migrant cohort. The migrant cohort  
27 consists of emigrants with legal permission to exit the Philippines for permanent residency in the  
28 U.S. Migrant cohort participants were enrolled starting at a pre-migration baseline before

1  
2  
3 departing the Philippines and will be followed prospectively after arriving in the U.S. up to three  
4 years. These migrant participants were recruited onsite at either the Manila or Cebu office of  
5 the Commission on Filipinos Overseas (CFO), the national Philippine government agency that  
6 oversees legal migration and where legal emigrants must register and process their exit from  
7 the Philippines. Trained research staff approached and screened individuals at the CFO  
8 locations for study eligibility: aged 20-59 years; departing the Philippines for the U.S. within  
9 three months; ability to speak English, Tagalog, or Cebuano; and not known to be pregnant (as  
10 this study prospectively assesses weight gain). From a total of 3,412 individuals approached,  
11 2,279 met eligibility criteria, and 832 (36.5% of those eligible) consented and enrolled in the  
12 study. While there were no target numbers for the migrant cohort by gender, age, and  
13 education; distributions along these categories ended up reflecting similar demographic profiles  
14 of the recent immigrant Filipino population in the U.S. For example, according to the 2011-2013  
15 American Community Survey (<https://www.census.gov/programs-surveys/acs>), among  
16 immigrant Filipinos who have been in the U.S. for less than two years, 11% are males aged 20-  
17 34 with a college education, which is the same percentage of this same group in the HoPES  
18 migrant cohort. Additional details are reported elsewhere.[30]

19  
20  
21  
22  
23  
24  
25  
26  
27  
28  
29  
30  
31  
32  
33  
34  
35  
36  
37 The second cohort consists of non-migrants who remain in the Philippines. Recruitment  
38 of this non-migrant cohort was based on stratified random sampling of households using three  
39 strata: Metro Manila (urban), Cebu (urban), and Cebu (rural). For each of these stratum,  
40 *barangay* (smallest administrative government division, somewhat like a census tract) were  
41 sampled with probability proportional to population size. Within each selected *barangay*, cluster  
42 sampling of households was conducted, then individuals were sampled within each household.  
43 Non-migrants were screened with the same age, language, and pregnancy inclusion criteria as  
44 migrants, with additional criteria of having resided in the *barangay* for the past two years and  
45 having no plans to move out of the *barangay* over the next three years. As non-migrants were  
46 sampled, numbers were tracked to achieve comparability to the gender, age, education, and  
47  
48  
49  
50  
51  
52  
53  
54  
55  
56  
57

urbanicity frequencies of the migrant cohort. Of the 2,215 non-migrant individuals approached, 1,173 met eligibility criteria, and 805 (68.6% of those eligible) consented and enrolled in the study.

Upon recruitment, the purpose and procedures of HoPES was explained to eligible individuals through the informed consent process. Participants were given opportunity to ask questions and contact information of the research team. Signed consent was obtained from participants for baseline and all subsequent data collection waves. Participants were assured that their participation would be kept confidential; and that data would be de-identified and reported only in the aggregate. Participants were also granted a certificate of confidentiality via the U.S. National Institutes of Health.

Table 1 provides demographic characteristics at time of recruitment and enrollment of the migrant and non-migrant participants, as well as those who were eligible but did not participate. Attrition rate for each of the cohorts has not yet been determined because collection of follow-up data is still ongoing; thus we report only on the baseline stage of the study.

**Table 1. Demographic characteristics of HoPES participants and non-participants at time of recruitment and enrollment.**

|                            | Migrants                |                                              |                 | Non-migrants            |                                             |                 |
|----------------------------|-------------------------|----------------------------------------------|-----------------|-------------------------|---------------------------------------------|-----------------|
|                            | Participants<br>(n=832) | Eligible<br>non-<br>participants<br>(n=1447) | <i>p</i> -value | Participants<br>(n=805) | Eligible<br>non-<br>participants<br>(n=355) | <i>p</i> -value |
| Age in years<br>(mean; SD) | 35.46<br>(11.57)        | 38.53<br>(11.64)                             | .000            | 36.53<br>(11.47)        | 35.77<br>(10.81)                            | .304            |
| Female<br>(number; %)      | 553<br>(66.47%)         | 865<br>(60.15%)                              | .003            | 548<br>(68.07%)         | 185<br>(50.41%)                             | .000            |
| Education<br>(number; %)   |                         |                                              | .049            |                         |                                             | .000            |

|                                     |                 |                 |  |                 |                 |  |
|-------------------------------------|-----------------|-----------------|--|-----------------|-----------------|--|
| Some high school or less            | 50<br>(6.08%)   | 63<br>(4.41%)   |  | 101<br>(12.85%) | 15<br>(4.18%)   |  |
| High school degree                  | 170<br>(20.68%) | 247<br>(17.30%) |  | 143<br>(18.19%) | 59<br>(16.43%)  |  |
| Some college or vocational training | 190<br>(23.11%) | 354<br>(24.79%) |  | 320<br>(40.71%) | 127<br>(35.38%) |  |
| College degree or higher            | 412<br>(50.12%) | 764<br>(53.50%) |  | 222<br>(28.24%) | 158<br>(44.01%) |  |

NOTE: Pearson's chi-squared tests were conducted to calculate  $p$ -values indicating if participant and non-participant groups were statistically different from each another.

For the migrant cohort, pre-migration baseline data (both survey-based and objective, biological measures; see below) was collected by trained research interviewers and nurses between February to September 2017. Subsequent collection of survey data is scheduled after arrival in the U.S. at 3, 12, and 24 months after baseline and will be conducted by telephone call from a trained research interviewer (because of logistical and budget constraints, since migrants can be located all across the U.S.). At 36 months after baseline, an in-person home visit will be made by a trained research nurse to collect both survey data and objective, biological measures. For the non-migrant cohort in the Philippines, baseline data (both survey-based and objective, biological measures) was collected by trained research interviewers and nurses between May to September 2017. Follow-up data collection for non-migrants will follow the same pattern as for migrants, except without the 3-month follow-up, and will be done via in-person home visits by trained research interviewers and nurses unless participant residence at the 12- and 24-month mark necessitates conducting by phone.

Baseline data collection for both the migrant and non-migrant cohorts was conducted in the Philippines. For migrants, this was done in private office spaces in the CFO buildings in Manila and Cebu. For non-migrants, this was done with in-home visits in community settings. Table 2 lists the types and topics of data collected at baseline. Self-report measures were collected via interviewer-administered survey. Migrants and non-migrants were asked the same survey questions, with migrants being asked an additional set of questions related to migration. Objective measures (e.g., height, weight, hip and waist circumferences, blood pressure) were obtained by trained nurses. A point-of-care device was used to measure a non-fasting lipid panel. Dried blood spots (DBS) were collected for laboratory analysis of c-reactive protein (CRP) and Apolipoprotein B (ApoB) levels. DBS specimens are being kept in frozen storage (-80° Celsius) and are available for other additional laboratory assay analyses in the future. The survey questions will be repeated for each follow-up data collection wave (as above); with phrasing modifications made to fit the post-migration context for the migrant cohort. As mentioned, objective, biological measures are only collected at baseline and 36 months later.

**Table 2. HoPES measures obtained at baseline for migrant and non-migrant cohorts.**

| <b>Self-report measures:</b> |                                                                                                                                                                                                    |
|------------------------------|----------------------------------------------------------------------------------------------------------------------------------------------------------------------------------------------------|
| Health status                | Self-rated health, chronic health conditions (MOS), medication use, depressive symptoms (Patient-Reported Outcomes Measurement Information System); cognitive impairment; homesickness             |
| Health behaviors             | Physical activity (International Physical Activity Questionnaire), smoking (CDC Behavioral Risk Factor Surveillance System), alcohol consumption (BRFSS), sleep quality and duration; help seeking |
| Diet                         | Food frequency questionnaire; food procurement and insecurity, dietary acculturation                                                                                                               |
| Stress                       | Perceived stress, acculturative stress, unfair treatment                                                                                                                                           |
| Culture                      | Filipino attitudes and beliefs, social identity, language use and proficiency (including English)                                                                                                  |

|                                 |                                                                                                                                                                                                                                                                                                                                                                                                  |
|---------------------------------|--------------------------------------------------------------------------------------------------------------------------------------------------------------------------------------------------------------------------------------------------------------------------------------------------------------------------------------------------------------------------------------------------|
| Socioeconomic position          | Currently employed, current occupation and job duties, personal income, financial strain, remittances                                                                                                                                                                                                                                                                                            |
| Social networks                 | Family and friends in the U.S. and Philippines, social isolation, social capital                                                                                                                                                                                                                                                                                                                 |
| Geography                       | Barangay and province for migrants; postal address for non-migrants; postal address in U.S. for migrants                                                                                                                                                                                                                                                                                         |
| Migration (migrant cohort only) | Visa type, family accompaniment, preparation, reasons for migrating, views about U.S., job waiting in U.S.                                                                                                                                                                                                                                                                                       |
| <b>Objective measures:</b>      |                                                                                                                                                                                                                                                                                                                                                                                                  |
| Anthropometrics                 | Height (Charder brand stadiometer model HM200P), weight (Tanita Corporation digital scale model BC-541 N), waist circumference and hip circumference (average of three readings; Weight and Measure brand tape measure model CAN150)                                                                                                                                                             |
| Biological measurements         | Systolic and diastolic blood pressure (average of three readings; Omron Healthcare electronic monitor model BP785N), lipids (non-fasting total cholesterol, high-density lipoproteins, low-density lipoproteins, triglycerides; PST diagnostics CardioCheck point-of-care device PA CHECK-1708), C-reactive protein and Apolipoprotein B (via dried blood spots; Whatman 903 Protein Saver card) |

### Patient and Public Involvement

No patient or public involvement.

### FINDINGS TO DATE

Table 3 displays initial univariate estimates (unweighted and weighted) across a variety of self-report and objective measures indicative of baseline health status for both the migrant and non-migrant cohorts. At baseline, migrants report significantly better self-rated health and fewer depressive symptoms, and have significantly larger hip circumference and lower waist-to-hip ratio, as well as significantly higher mean systolic blood pressure and higher mean level of ApoB. For migrants, the principal reasons for emigrating were to join family members already in the U.S. (n=770) and for employment (n=62). Migrants settled across all regions of the U.S., with the top states being California, Texas, Washington, Hawaii, Florida, and Nevada, thus far.



**Table 3. Mean or proportion (and standard error) for health status measures comparing migrants and non-migrants (weighted vs. unweighted; both adjusted for age and sex).**

|                                                          | Migrants (n=832) |              | Non-migrants (n=805) |              | <i>p</i> -value             |                           |
|----------------------------------------------------------|------------------|--------------|----------------------|--------------|-----------------------------|---------------------------|
|                                                          | Unweighted       | Weighted     | Unweighted           | Weighted     | Comparing unweighted values | Comparing weighted values |
| Self-rated health (Excellent/Very good/Good; proportion) | .74 (.02)        | .73 (.02)    | .34 (.02)            | .35 (.02)    | .000                        | .000                      |
| Depressive symptoms; range: 5 (low) to 25 (high)         | 6.55 (.09)       | 6.52 (.09)   | 8.53 (.13)           | 8.51 (.14)   | .000                        | .000                      |
| Height (cm); mean                                        | 158.09 (.20)     | 158.00 (.20) | 155.88 (.20)         | 156.20 (.21) | .000                        | .000                      |
| Weight (kg)                                              | 60.93 (.38)      | 61.14 (.39)  | 60.33 (.44)          | 60.50 (.46)  | .338                        | .275                      |
| Body mass index (kg/m <sup>2</sup> )                     | 24.27 (.14)      | 24.38 (.14)  | 24.77 (.16)          | 24.72 (.17)  | .057                        | .132                      |
| Waist circumference (cm)                                 | 86.00 (.34)      | 86.32 (.34)  | 86.41 (.39)          | 86.37 (.40)  | .806                        | .969                      |
| Hip circumference (cm)                                   | 95.94 (.26)      | 96.10 (.26)  | 94.47 (.30)          | 94.50 (.31)  | .000                        | .000                      |
| Waist-to-hip ratio                                       | .89 (.00)        | .89 (.00)    | .91 (.00)            | .91 (.00)    | .000                        | .000                      |
| Systolic blood pressure (mmHg)                           | 120.52 (.53)     | 121.18 (.55) | 119.10 (.61)         | 119.02 (.63) | .007                        | .007                      |
| Diastolic blood pressure (mmHg)                          | 80.40 (.35)      | 80.67 (.36)  | 79.96 (.41)          | 80.09 (.43)  | .144                        | .274                      |
| C-reactive protein (mg/L)                                | 1.68 (.10)       | 1.69 (.10)   | 1.90 (.12)           | 1.91 (.12)   | .19                         | .06                       |
| Apolipoprotein B (mg/dL)                                 | 33.24 (.53)      | 33.34 (.53)  | 24.40 (.46)          | 23.94 (.46)  | .000                        | .000                      |

NOTE: T-tests for continuous variables and z-tests for categorical variables were conducted using multilinear regression models to calculate *p*-values indicating if migrant and non-migrant groups were statistically different from each another for each predictor and for both weighted and unweighted analyses, controlling for age and sex.

## STRENGTHS AND LIMITATIONS

HoPES is one of the few longitudinal studies of migration and health that has enrolled participants starting from a pre-migration baseline phase in one country (Philippines) and followed them into a post-migration period in another (U.S.). Other known studies have followed migrants from Mexico to the U.S. and migrants from Russia and Ukraine to Israel.[31-34] Our study has the added feature of following a migrant cohort across continents from Asia to North America. Conventional understandings of immigrant health have relied principally on data collected after migration, for example the National Latino and Asian American Study (U.S.)[35] and the Research on Obesity and Diabetes among African Migrants project (Germany, Netherlands, United Kingdom; and Ghana allowing for comparison to non-migrants in the country of origin).[26] The New Immigrant Study does follow prospectively a cohort of adult and child immigrants in the U.S., but also captures only post-migration data.[36] Importantly, these and other studies like them offer valuable insights about the a range of health status outcomes and experiences of immigrants, including disparities in health relative to populations native to the destination country. While findings from these studies provide the basis for attending to the health needs of immigrant communities that bear disproportionate burdens of illness, this established body of literature warrants a more expansive view of immigrant health. Notably, prospective examination of health inclusive of the pre-migration period can provide a more complete picture of transitions in health throughout the dynamic nature of migration.

As mentioned above, the demographic profile of our migrant cohort is very similar to that of the recent immigrant Filipino population in the U.S., per the 2011-2013 American Community Survey. A group of non-migrants (similar in age, gender, and education) in the country of origin is enrolled, which other studies of migration and health have not included, providing opportunities for comparative data analyses. For migrants, having started from a pre-migration baseline, data represent health status and life experiences prior to migration. Data, for both migrants and non-migrants, include objective, biological measures of health status, in addition to

1  
2  
3 self-report responses that, to our knowledge, have not been collected in other longitudinal  
4 studies of migration. The collection and frozen banking of DBS creates future opportunities for  
5 laboratory analyses of emerging and yet to be developed assays. Also, meticulous efforts were  
6 undertaken to assure linguistic and cultural appropriateness of survey instruments, including  
7 data obtained through a food frequency questionnaire tailored to Filipino foods and diet.  
8  
9 Additionally, for each participant, residential address is collected at each follow-up wave,  
10 allowing for geocoding and analyses integrating geographical information system data.  
11  
12

13  
14  
15  
16  
17  
18 Due to the nature of the study, the non-migrants are purposefully not representative of  
19 the general population of the Philippines. This was due to our aim to evaluate the effect of  
20 migration as a “treatment.” Similar to a randomized clinical trial, it is desirable to have the two  
21 cohorts similar on key characteristics at baseline. Thus, our objective for the non-migrant cohort  
22 was to enroll a group similar in characteristics (age, gender, education) to the migrant cohort,  
23 which would then render the non-migrant sample not representative of the general population.  
24  
25 While the overall sample sizes for each cohort are sufficiently large for our study purposes, it  
26 may be limiting for analyses focused on specific sub-groups (e.g., only women with less than a  
27 high school education).  
28  
29  
30  
31  
32  
33  
34  
35

36  
37 Another potential weakness relates to participation rates and potential for sampling bias.  
38 Comparing participants to eligible non-participants, per Table 1, a few demographic differences  
39 were statistically significant. For example, migrant participants were older than migrants who  
40 were eligible but did not participate; non-migrant participants tended to be more educated than  
41 non-migrants who were eligible but did not participate; and for both migrant and non-migrant  
42 cohorts, there were more females among participants than among eligible non-participants.  
43  
44  
45  
46  
47  
48

49  
50 With any cohort study, attrition is a concern, particularly when participants are in a state  
51 of geographic movement across countries (migrants) and, likely, within country (migrants after  
52 arriving in the U.S. and non-migrants in the Philippines). It is possible, over the course of the  
53 study, that migrant participants may return to the Philippines or re-locate to other countries for  
54  
55  
56  
57

1  
2  
3 periods of time and that non-migrant participants may become migrants themselves (whether to  
4 the U.S. or elsewhere). While this poses additional challenges, if such cases emerge and are  
5 retained, their data can yield potentially interesting, unanticipated findings about continued  
6 migration transitions. Because we currently report only on the baseline stage of this study,  
7 retention rates and mobility patterns over the course of the study have yet to unfold. Strategies  
8 to promote retention have been implemented, such as phone calls, a newsletter, social media,  
9 and birthday greetings. Also, we intentionally over sampled to account for attrition. Lastly, our  
10 study does not include a third cohort group of U.S. born Filipinos, which would have provided  
11 another comparison group to more fully examine the immigrant health paradox.  
12  
13  
14  
15  
16  
17  
18  
19  
20  
21

## 22 **COLLABORATION**

23  
24 Researchers wishing to work with HoPES data can contact the co-principal investigators  
25 – Gilbert C. Gee, PhD, Professor, UCLA Fielding School of Public Health, 650 Charles E. Young  
26 Drive South, Los Angeles, CA 90095-1772, e-mail: gilgee@ucla.edu; and, A.B. de Castro, PhD,  
27 MSN/MPH, RN, FAAN, University of Washington School of Nursing, Box 357260, Seattle, WA  
28 98195, e-mail: butchdec@uw.edu – to discuss analysis ideas and possible collaborative efforts.  
29  
30 Requests are invited for studies that examine the variety of cross-sectional and longitudinal  
31 associations between sociodemographic characteristics, geographical locations (e.g. migration  
32 patterns, neighborhood/community factors), stressors, cultural shifts and both subjective and  
33 objective measures of health and health behaviors (including and beyond obesity risk related  
34 outcomes) that characterize how differential burdens of illness/disease play out in the context of  
35 migration and globalization. Also, because DBS are frozen and stored, collaborations involving  
36 studies with laboratory analysis of analytes other than CRP and Apolipoprotein B are of interest.  
37  
38  
39  
40  
41  
42  
43  
44  
45  
46  
47  
48

49 A data user agreement is available for interested researchers to specify a working title of  
50 their proposed project; a 1-2 paragraph abstract that articulates a research question,  
51 hypotheses, and supporting rationale; a description of the analysis plan, including the specific  
52 statistical techniques to be used; the list the specific variables needed for the analysis, including  
53  
54  
55  
56  
57  
58  
59  
60

1  
2  
3 identifying dependent vs. independent variables, and control variables; and a statement of  
4 dissemination plans, including prospective journals and conference meetings where the analysis  
5 will be reported. The co-principal investigators will consider the request and determine its  
6 approval. The data user agreement also delineates a list of conditions that users must agree to;  
7 such as not sharing or distributing the data without prior authorization from the co-principal  
8 investigators, using the requested data only according to the proposed use, sharing with the co-  
9 principal investigators documentation of new variables of major study constructs, and prompt  
10 notification of submissions and acceptances for presentations and publications.  
11  
12  
13  
14  
15  
16  
17  
18  
19

## 20 **FURTHER DETAILS**

21  
22 Ethics review and approval to conduct HoPES were granted by the institutional review  
23 boards at the University of California, Los Angeles (U.S.), and the University of San Carlos  
24 (Cebu, Philippines).  
25  
26  
27

28 HoPES would not have been possible without the imaginative ingenuity, collaborative  
29 spirit, and tireless efforts from multiple sources. The interdisciplinary team consists of  
30 researchers and staff from the U.S. and the Philippines with a shared interest and vision to  
31 advance the health of immigrant populations. The co-principal investigators of HoPES are  
32 Gilbert C. Gee, PhD, Professor, UCLA Fielding School of Public Health, 650 Charles E. Young  
33 Drive South, Los Angeles, CA 90095-1772, e-mail: gilgee@ucla.edu; and, A.B. de Castro, PhD,  
34 MSN/MPH, RN, FAAN, University of Washington School of Nursing, Box 357260, Seattle, WA  
35 98195, e-mail: butchdec@uw.edu. In addition to the authors, others making important  
36 contributions through their knowledge, skills, and time were Anna Vivas, Elma P. Laguna,  
37 Christian Joy P. Cruz, Tita Lorna Perez, Delia B. Carba, Nikola Mae Y. Belarmino, Klarriness P.  
38 Tanalgo, Vanessa Medina, and all members of the data collection staff. The cooperation,  
39 approval, support, and assistance from staff of the Commission on Filipinos Overseas, namely  
40 Regina Galias, Ivy Miravalles, Kimberly Dizon, Golda Myra Roma, and Paul Vincent Avecilla,  
41 made it possible to recruit and enroll migrant participants. We also greatly appreciate  
42  
43  
44  
45  
46  
47  
48  
49  
50  
51  
52  
53  
54  
55  
56  
57

1  
2  
3 permissions granted and facilitated by government officials in local municipal jurisdictions to  
4 enter communities to recruit and enroll non-migrant participants from community households.  
5  
6 And, we express our deep appreciation to all of the HoPES participants who generously  
7 provided their time and willingness for us to collect data measures. Lastly, we dedicate this  
8  
9 paper to Eularito A. Tagalog in memory of his truly incomparable friendship and many selfless  
10  
11 acts to help make this research project a reality.  
12  
13  
14

### 15 **CONTRIBUTORSHIP STATEMENT**

16  
17 Dr. de Castro led the conceptualization and writing of this paper with writing and  
18 statistical analysis assistance from Ms. Hing. Drs. Crespi, Gee, Kabamalan, Lee, and Wang  
19 collaborated to conceptualize and execute the overall HoPES project; and Ms. Llave managed  
20  
21 HoPES project operations. All authors assisted with the writing content.  
22  
23  
24  
25

### 26 **COMPETING INTERESTS**

27  
28 None of the authors have a competing interest with regard to the HoPES research  
29 project or the publishing of this report.  
30  
31

### 32 **FUNDING**

33  
34 Primary funding for HoPES was provided by the U.S. National Institutes of Health –  
35 Eunice Kennedy Shriver National Institute of Child Health and Human Development  
36 (1R01HD083574-01A1), and, prior pilot funding was provided by the U.S. National Institutes of  
37  
38 Health – National Cancer Institute (1R21CA137297-01A1) and the California Center for  
39  
40 Population Research at the University of California, Los Angeles (P2C-HD041022).  
41  
42  
43  
44

### 45 **DATA SHARING STATEMENT**

46  
47 Inquiries about the questionnaire, data, and accessing data can be directed to the co-  
48 principal investigators, Dr. Gilbert C. Gee (gilgee@ucla.edu) and Dr. A.B. de Castro  
49  
50 (butchdec@uw.edu).  
51  
52  
53  
54  
55  
56  
57  
58  
59  
60

**REFERENCES**

1. Antecol H, Bedard K. Unhealthy assimilation: Why do immigrants converge to American health status levels? *Demography* 2006;43(2):337-60.
2. Argeseanu Cunningham S, Ruben JD, Narayan KM. Health of foreign-born people in the United States: A review. *Health Place* 2008;14(4):623-35.
3. Frisbie WP, Cho Y, Hummer RA. Immigration and the health of Asian and Pacific Islander adults in the United States. *Am J Epidemiol* 2001;153(4):372-80.
4. Goldman N, Pebley AR, Creighton MJ, et al. The consequences of migration to the United States for short-term changes in the health of Mexican immigrants. *Demography* 2014;51(4):1159-73.
5. Ro A. The longer you stay, the worse your health? A critical review of the negative acculturation theory among Asian immigrants. *Int J of Environ Res and Public Health* 2014;11(8):8038-57.
6. Fuller-Thomson E, Noack AM, George U. Health decline among recent immigrants to Canada: findings from a nationally-representative longitudinal survey. *Can J Public Health* 2011;102(4):273-80.
7. Alarcón RD, Parekh A, Wainberg ML, et al. Hispanic immigrants in the USA: Social and mental health perspectives. *Lancet Psychiatry* 2016;3(9):860-70.
8. Franzini L, Ribble JC, Keddie AM. Understanding the Hispanic paradox. *Ethn Dis* 2001;11(3):496-518.
9. Markides K, Coreil J. The health of Hispanics in the south-western United States: An epidemiological paradox. *Public Health Rep* 1986;10:253-65.
10. Zong J, Batalova J. Filipino immigrants in the United States. Migration Information Source; March 14, 2018. Available from: <https://www.migrationpolicy.org/article/filipino-immigrants-united-states>. Accessed July 14, 2019.



11. Abesamis CJ, Fruh S, Hall H, et al. Cardiovascular health of Filipinos in the United States: A review of the literature. *J Transcult Nurs* 2016;27(5):518–28.
12. Du Y, Shih M, Lightstone AS, et al. Hypertension among Asians in Los Angeles County: Findings from a multiyear survey. *Prev Med Rep* 2017;6:302-6.
13. Lee JW, Brancati FL, Yeh HC. Trends in the prevalence of type 2 diabetes in Asians versus whites: results from the United States National Health Interview Survey, 1997-2008. *Diabetes Care* 2011;34(2):353-7.
14. Singh GK, Lin SC. Dramatic increases in obesity and overweight prevalence among Asian subgroups in the United States, 1992-2011. *ISRN Prev Med* 2013;898691.
15. Staimez LR, Weber MB, Narayan KM, et al. A systematic review of overweight, obesity, and type 2 diabetes among Asian American subgroups. *Curr Diabetes Rev* 2013;9(4):312-31.
16. Ye J, Rust G, Baltrus P, et al. Cardiovascular risk factors among Asian Americans: Results from a national health survey. *Ann Epidemiol* 2009;19(10):718-23.
17. Ayala GX, Baquero B, Klinger S. A systematic review of the relationship between acculturation and diet among Latinos in the United States: implications for future research. *J Am Diet Assoc* 2008;108(8):1330-44.
18. Kandula NR, Lauderdale DS. Leisure time, non-leisure time, and occupational physical activity in Asian Americans. *Ann Epidemiol* 2005;15(4):257-65.
19. Serafica RC. Dietary acculturation in Asian Americans. *J Cult Divers* 2014;21(4):145-51.
20. Tovar A, Boulos R, Sliwa S, et al. Baseline socio-demographic characteristics and self-reported diet and physical activity shifts among recent immigrants participating in the randomized controlled lifestyle intervention: "Live Well." *J Immigr Minor Health* 2014;16(3):457-65.
21. Zan H, Fan JX. Reporting more but moving less? The complex relationship between acculturation and physical activity among US adults. *Am J Health Promot* 2018;32(2):446-52.



- 1
- 2
- 3 22. Finch BK, Catalano RC, Novaco RW, et al. Employment frustration and alcohol
- 4
- 5 abuse/dependence among labor migrants in California. *J Immigr Health* 2003;5(4):181-6.
- 6
- 7 23. Gee GC, Ro A, Gavin A, et al. Disentangling the effects of racial and weight discrimination
- 8
- 9 on body mass index and obesity among Asian Americans. *Am J Public Health*
- 10
- 11 2008;98(3):493-500.
- 12
- 13 24. Tovar A, Must A, Metayer N, et al. Immigrating to the US: What Brazilian, Latin American
- 14
- 15 and Haitian women have to say about changes to their lifestyle that may be associated with
- 16
- 17 obesity. *J Immigr Minor Health* 2013;15(2):357-64.
- 18
- 19 25. Murphy M, Robertson W, Oyebo O. Obesity in international migration populations. *Curr*
- 20
- 21 *Obes Res* 2017;6(3):314-323.
- 22
- 23 26. Agyemang C, Beune E, Meeks K, et al. Rationale and cross-sectional study design of the
- 24
- 25 Research on Obesity and type 2 Diabetes among African Migrants: The RODAM study. *BMJ*
- 26
- 27 *Open* 2014;4(3):e004877.
- 28
- 29 27. NCD Risk Factor Collaboration (NCD-RisC). Worldwide trends in body-mass index,
- 30
- 31 underweight, overweight, and obesity from 1975 to 2016: A pooled analysis of 2416
- 32
- 33 population-based measurement studies in 128·9 million children, adolescents, and adults.
- 34
- 35 *Lancet* 2017;390(10113):2627-42.
- 36
- 37 28. Ng M. Global, regional, and national prevalence of overweight and obesity in children and
- 38
- 39 adults during 1980-2013: A systematic analysis for the Global Burden of Disease Study
- 40
- 41 2013. *Lancet* 2014;384(9945):766-81.
- 42
- 43 29. Obesity Update 2017. The Organisation for Economic Co-operation and Development
- 44
- 45 (OECD); 2017. Available from: [https://www.oecd.org/els/health-systems/Obesity-Update-](https://www.oecd.org/els/health-systems/Obesity-Update-2017.pdf)
- 46
- 47 [2017.pdf](https://www.oecd.org/els/health-systems/Obesity-Update-2017.pdf). Accessed July 14, 2019.
- 48
- 49 30. Gee GC, de Castro AB, Crespi CM, et al. Health of Philippine Emigrants Study (HoPES):
- 50
- 51 Study design and rationale. *BMC Public Health* 2018;18:771.
- 52
- 53
- 54
- 55
- 56
- 57
- 58
- 59
- 60

- 1  
2  
3 31. Breslau J, Borges G, Tancredi DJ, et al. Health selection among migrants from Mexico to  
4 the U.S.: Childhood predictors of adult physical and mental health. *Public Health Rep*  
5 2011;126(3):361-70.  
6  
7  
8  
9 32. Goldman N, Pebley AR, Creighton MJ, et al. The consequences of migration to the United  
10 States for short-term changes in the health of Mexican immigrants. *Demography*  
11 2014;51(4):1159-73.  
12  
13  
14  
15 33. Tartakovsky E. A longitudinal study of acculturative stress and homesickness: High-school  
16 adolescents immigrating from Russia and Ukraine to Israel without parents. *Soc Psychiatry*  
17 *Psychiatr Epidemiol* 2007;42(6):485-94.  
18  
19  
20  
21 34. Tartakovsky E. Cultural identities of adolescent immigrants: A three-year longitudinal study  
22 including the pre-migration period. *J Youth Adolesc* 2009;38(5):654-71.  
23  
24  
25  
26 35. Alegria M, Takeuchi D, Canino G, et al. Considering context, place and culture: the National  
27 Latino and Asian American Study. *Int J Methods Psychiatr Res* 2004;13(4):208-20.  
28  
29  
30  
31 36. Jasso G, Massey DS, Rosenzweig MR et al. The U.S. New Immigrant Survey: overview and  
32 preliminary results based on the new-immigrant cohorts of 1996 and 2003. in Morgan B,  
33 Nicholson B, eds. *Immigration Research and Statistics Service Workshop on Longitudinal*  
34 *Surveys and Cross-Cultural Survey Design: Workshop Proceedings*. London, UK: Crown  
35 Publishing 2005:29-46.  
36  
37  
38  
39  
40  
41  
42  
43  
44  
45  
46  
47  
48  
49  
50  
51  
52  
53  
54  
55  
56  
57  
58  
59  
60
